# Supplementary material
Source: HighWire-hosted journal article supplement (https://www.rcpjournals.org/highwire/filestream/7175/field_highwire_adjunct_files/0/Elliot_S1.pdf)
Supplement: Elliot_S1.pdf [file Elliot_S1.pdf]

| Case number                                                                           | Comorbidity                   | Steroid            | ARV             | Presenting features                                      | 9 am Cortisol (nmol/L) | AI on SST at presentation | Endo Input | Management                                                                                                                                                                                   | Adrenal crisis advice given? | Biochemical Evidence of HPA axis recovery? |
|---------------------------------------------------------------------------------------|-------------------------------|--------------------|-----------------|----------------------------------------------------------|------------------------|---------------------------|------------|----------------------------------------------------------------------------------------------------------------------------------------------------------------------------------------------|------------------------------|--------------------------------------------|
| <b>Centre A, cohort size: 3,300; number of cortisol requests in 9 months: unknown</b> |                               |                    |                 |                                                          |                        |                           |            |                                                                                                                                                                                              |                              |                                            |
| 1                                                                                     | Disc prolapse & radiculopathy | InjTAC 40mg X4     | ATV/r KIV       | Cushing's Syndrome night sweat and polyuria & polydipsia | <10                    | Y                         | Y          | <ul style="list-style-type: none"> <li>ART switched to KIV/RAL</li> <li>HC replacement at 10 mg BD for 11 weeks then 10 mg daily for 10 weeks</li> </ul>                                     | Y                            | Y, 18 weeks                                |
| 2                                                                                     | COPD                          | inhFLU + PRED      | ATV/r TVD       | Cushing's Syndrome inc low mood                          | ND – SST done directly | Y                         | Y          | <ul style="list-style-type: none"> <li>inhFLU stopped</li> <li>ART switched to TVD/RAL/MVC</li> <li>HC replacement at 10 mg/5 mg/5 mg for 48 weeks, then 10 mg daily for 24 weeks</li> </ul> | Y                            | Y, 73 weeks                                |
| 3                                                                                     | Chronic Sinusitis             | nFLU               | DRV/r TVD       | Cushing's Syndrome                                       | <10                    | Y                         | Y          | <ul style="list-style-type: none"> <li>Switch ART to TVD/RAL</li> <li>HC replacement at 10 mg BD for 45 weeks</li> </ul>                                                                     | Y                            | Y, 40 weeks                                |
| <b>Centre B, cohort size: 4,117; number of cortisol requests in 9 months: 18</b>      |                               |                    |                 |                                                          |                        |                           |            |                                                                                                                                                                                              |                              |                                            |
| 4                                                                                     | Asthma                        | inhFLU,            | LPV/r Tenofovir | Cushing's Syndrome inc new HTN, Cataracts                | GP                     | GP                        | N          | <ul style="list-style-type: none"> <li>inhFLU, stopped</li> <li>HC replacement, dose not given</li> </ul>                                                                                    | N                            | ND                                         |
| 5                                                                                     | Asthma                        | inhFLU,            | DRV/r TVD       | Cushing's Syndrome inc new HTN                           | 11                     | ND: assessed clinically   | Y          | <ul style="list-style-type: none"> <li>Switched to BEC</li> <li>HC replacement 10 mg 1 week then 5 mg 1 week</li> </ul>                                                                      | Y                            | Y<br>On review at 12 weeks                 |
| 6                                                                                     | Asthma OA                     | inhFLU plus injTAC | DRV/r mono      | Fatigue                                                  | 76                     | ND: assessed clinically   | N          | <ul style="list-style-type: none"> <li>inhFLU stopped</li> <li>injTAC ceased</li> <li>monitored only</li> </ul>                                                                              | N                            | ND                                         |

|                                                                                  |                                          |                   |               |                      |                              |                              |   |                                                                                                                                                                                         |    |                                         |
|----------------------------------------------------------------------------------|------------------------------------------|-------------------|---------------|----------------------|------------------------------|------------------------------|---|-----------------------------------------------------------------------------------------------------------------------------------------------------------------------------------------|----|-----------------------------------------|
| 7                                                                                | Asthma                                   | inhFLU            | ATV/r<br>TVD  | Cushing's Syndrome   | 39                           | Y                            | Y | <ul style="list-style-type: none"> <li>inhFLU stopped</li> <li>ART switched to Truv/ETV</li> <li>HC replacement 10 mg 1 week then reduced 5 mg 1 week</li> </ul>                        | Y  | ND                                      |
| 8                                                                                | Bronchiectasis                           | inhFLU            | ATV/r<br>TVD  | Fatigue              | GP                           | GP                           | N | <ul style="list-style-type: none"> <li>inhFLU stopped</li> </ul>                                                                                                                        | NA | ND                                      |
| 9                                                                                | Asthma                                   | inhFLU            | DRV/r<br>TVD  | Fatigue, weight loss | ND-SST<br>done<br>directly   | Y                            | Y | <ul style="list-style-type: none"> <li>inhFLU switched to inhBUD post ICS</li> <li>HC replacement 10 mg 1 week then reduced 5 mg 1 week</li> <li>ART switched to TDF/MVC/RAL</li> </ul> | Y  | Y<br>On review at 26 weeks              |
| 10                                                                               | Shoulder OA                              | InjTAC            | DRV/r<br>mono | Fatigue              | 4-40                         | Y                            | Y | <ul style="list-style-type: none"> <li>injTAC ceased</li> <li>HC replacement 10 mg maintained</li> </ul>                                                                                | N  | ND                                      |
| 11                                                                               | Vertebral OA                             | InjTAC            | DRV/r<br>mono | Fatigue              | 30                           | Y                            | N | <ul style="list-style-type: none"> <li>injTAC ceased</li> <li>Monitored only</li> </ul>                                                                                                 | N  | Y<br>On review at 26 weeks              |
| 12                                                                               | SLE                                      | InjTAC            | ATV/r<br>TVD  | Cushing's Syndrome   | ND - SST<br>done<br>directly | Y                            | Y | <ul style="list-style-type: none"> <li>injTAC ceased</li> <li>HC replacement 10 mg maintained</li> </ul>                                                                                | N  | Y<br>On review at 26 weeks              |
| <b>Centre C, cohort size: 7,700; number of cortisol requests in 9 months: 82</b> |                                          |                   |               |                      |                              |                              |   |                                                                                                                                                                                         |    |                                         |
| 13                                                                               | TB IRIS                                  | PRED              | DRV/r<br>KIV  | Cushing's Syndrome   | <20                          | ND<br>Assessed<br>clinically | N | <ul style="list-style-type: none"> <li>PRED stopped</li> </ul>                                                                                                                          | N  | ND                                      |
| 14                                                                               | Eosinophilic<br>Folliculitis<br>Keratosi | topEUM<br>+ topFA | LPV/r<br>3TC  | Addisonian crisis    | 30                           | Y                            | Y | <ul style="list-style-type: none"> <li>Topical steroids stopped</li> <li>HC replacement (at 10/5/5 mg for 25 weeks followed</li> </ul>                                                  | y  | Y – at 3 years 9 months, after extended |

|    |                                     |                                              |               |                                                          |     |                              |   |                                                                                                                                                                          |   |                                                  |
|----|-------------------------------------|----------------------------------------------|---------------|----------------------------------------------------------|-----|------------------------------|---|--------------------------------------------------------------------------------------------------------------------------------------------------------------------------|---|--------------------------------------------------|
|    | Pilaris                             |                                              |               |                                                          |     |                              |   | by 10/5 mg for 25 weeks,<br>10/2.5 mg for 58 weeks,<br>and 5/5 mg for 3 weeks )+<br>FC 50 µg                                                                             |   | monitoring                                       |
| 15 | Tendinosis                          | injTAC 40<br>mg x3                           | DRV/r<br>mono | Adrenal<br>insufficiency                                 | <20 | Y                            | N | <ul style="list-style-type: none"> <li>• injTAC ceased</li> <li>• Monitored only</li> </ul>                                                                              | N | ND                                               |
| 16 | Asthma                              | inhFLU                                       | ATV/R<br>TVD  | Cushing's Syndrome                                       | 301 | ND<br>Assessed<br>clinically | N | <ul style="list-style-type: none"> <li>• inhFLU stopped</li> </ul>                                                                                                       | N | ND                                               |
| 17 | OA                                  | injTAC<br>40 mg x3                           | DRV/R<br>3TC  | Cushing's Syndrome<br>inc Osteoporosis,<br>AVN           | 16  | ND<br>Assessed<br>clinically | N | <ul style="list-style-type: none"> <li>• ART switched to TVD/RAL</li> </ul>                                                                                              | N | ND                                               |
| 18 | Seronegative<br>arthropathy<br>COPD | PRED +<br>injTAC +<br>InjMPRED<br>(multiple) | SAQ/R<br>TVD  | Cushing's Syndrome<br>inc osteoporosis,<br>high BMs, OSA | 23  | ND<br>Assessed<br>clinically | Y | <ul style="list-style-type: none"> <li>• ART switched to<br/>TVD/ETV/RAL</li> <li>• HC replacement 10 mg BD<br/>maintained</li> <li>• PRED switched to DMARDs</li> </ul> | Y | N – remains<br>unrecovered at<br>time of writing |
| 19 | Asthma                              | inhFLU                                       | DRV/r<br>mono | Cushing's Syndrome                                       | 228 | ND<br>Assessed<br>clinically | N | <ul style="list-style-type: none"> <li>• ART switched to EVP</li> </ul>                                                                                                  | N | ND                                               |

**Table S1. Summary and management of ICS and SAI resulting from ritonavir/glucocorticoid interactions in three large London HIV centres (evaluation period: 01/01/12–30/09/12)**

ND = not done; inhBUD = inhaled budesonide; inhFLU = inhaled fluticasone; nFLU = nasal fluticasone; BEC = beclamethasone; HC = hydrocortisone; PRED = prednisolone; injTAC = injected triamcinolone; InjMPRED = injected methylprednisolone (depomedrone); topEUM = topical eumovate; topFA = topical fluocinolone acetonide; FC = fludrocortisone; SAB = subacromial bursitis; COPD = chronic obstructive pulmonary disease; OA = osteoarthritis; LE = lateral epicondylitis; HTN = hypertension; OSA = obstructive sleep apnoea; AVN = avascular necrosis; HTN = hypertension; TB IRIS = tuberculosis-associated immune reconstitution inflammatory syndrome; KIV = kivexa (abacavir+lamivudine); TVD = truvada (emtricitabine+tenofovir); TDF = tenofovir; DRV = darunavir; ATV = atazanavir; r = ritonavir; SQV = saquinavir; LPV = lopinavir; NVP = nevirapine; 3TC = lamivudine; MVC = maraviroc; RAL = raltegravir; EVP = evirola; mono = boosted PI monotherapy; AI = adrenal insufficiency; N = no; Y = yes; GP = general practitioner; DMARDs = disease-modifying anti-rheumatic drugs
